# Supplementary material for: Dasatinib + Gefitinib, a non platinum-based combination with enhanced growth inhibitory, anti-migratory and anti-invasive potency against human ovarian cancer cells
Source: Springer Nature journal article supplement (doi:10.1186/s13048-017-0319-2), 2017-04-26
Supplement: MOESM2 [file 12250026]

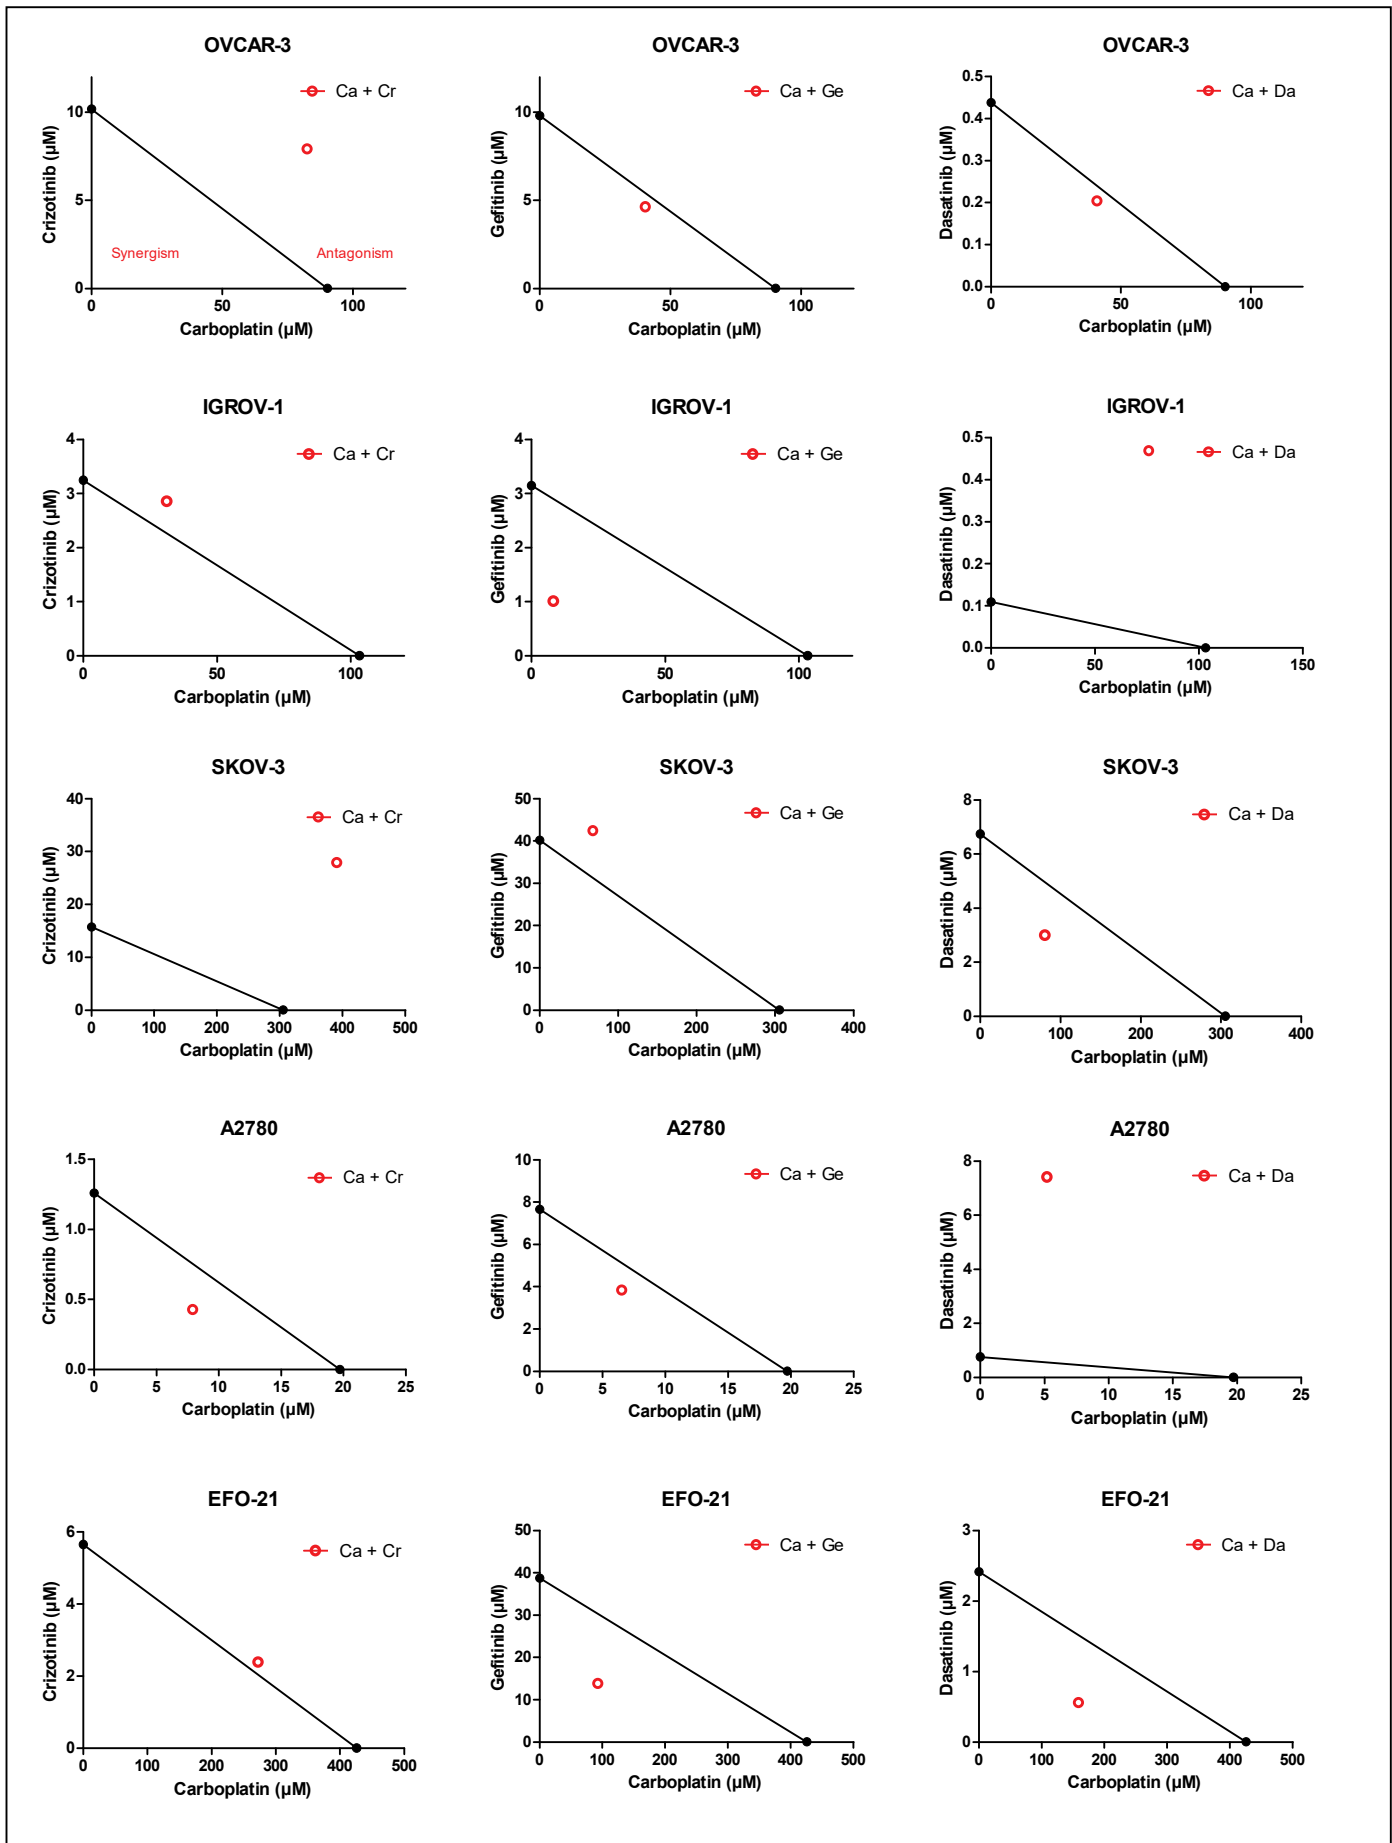

**Additional file 2**
