# Supplementary material for: Dasatinib + Gefitinib, a non platinum-based combination with enhanced growth inhibitory, anti-migratory and anti-invasive potency against human ovarian cancer cells
Source: Springer Nature journal article supplement (doi:10.1186/s13048-017-0319-2), 2017-04-26
Supplement: MOESM6 [file 13048_2017_319_MOESM6_ESM.pdf]

**A****Migration - 24h**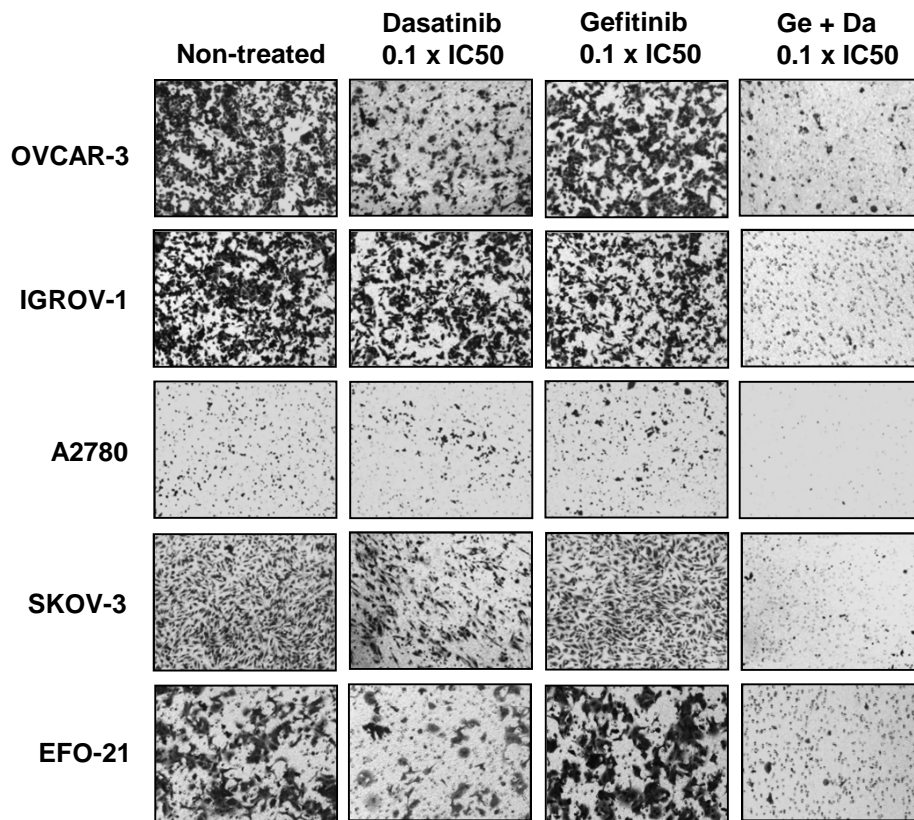**B****Invasion 24h**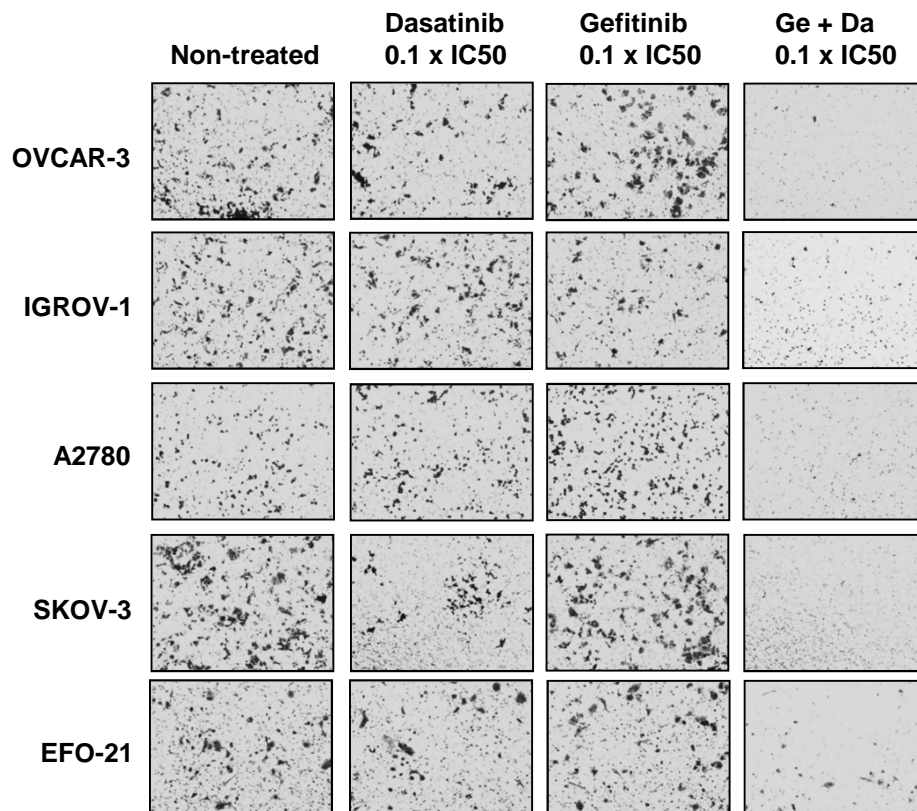**Additional file 6**
